# Supplementary material
Source: PubMed Central journal article supplement (PMC3866217)

**Supplemental Table. Sample size for the CARDIA study and NHANES-linked mortality file among overweight and obese participants.**

|                              | number (weighted %) |            |           |           |           |           |
|------------------------------|---------------------|------------|-----------|-----------|-----------|-----------|
|                              |                     | Risk level |           |           |           |           |
|                              | All                 | Stage 0    | Stage 1   | Stage 2   | Stage 3   | Stage 4   |
| NHANES-linked mortality file |                     |            |           |           |           |           |
| All                          | 2725(64.1)          | 101(3.4)   | 561(14.6) | 675(17.0) | 589(13.8) | 799(15.3) |
| Men                          | 1319(33.0)          | 62(1.9)    | 228(6.4)  | 339(8.4)  | 287(7.4)  | 403(8.8)  |
| Women                        | 1406(31.1)          | 39(1.5)    | 333(8.2)  | 336(8.6)  | 302(6.4)  | 396(6.5)  |
| NHW                          | 1152(50.8)          | 45(2.8)    | 228(11.4) | 297(13.9) | 270(10.8) | 312(11.9) |
| NHB                          | 707(6.3)            | 31(0.3)    | 186(1.8)  | 179(1.6)  | 111(1.0)  | 200(1.6)  |
| MEX                          | 770(2.9)            | 20(0.1)    | 126(0.6)  | 181(0.7)  | 183(0.7)  | 260(0.8)  |
| Alive                        | 96(4.0)             | 5(0.2)     | 21(0.9)   | 18(0.8)   | 25(1.4)   | 27(0.9)   |
| Deceased                     | 2063(51.1)          | 93(3.3)    | 485(13.1) | 559(14.5) | 434(10.4) | 492(9.9)  |
| No CVD death                 | 662(12.9)           | 8(0.2)     | 76(1.6)   | 116(2.4)  | 155(3.4)  | 307(5.4)  |
| CVD death                    | 2451(59.0)          | 99(3.4)    | 537(14.1) | 629(16.1) | 537(12.9) | 649(12.5) |
| The CARDIA Study             |                     |            |           |           |           |           |
| All                          | 1876                | 550        | 980       | 268       | 78        |           |
| Men                          | 915                 | 311        | 422       | 142       | 40        |           |
| Women                        | 961                 | 239        | 558       | 126       | 38        |           |
| Blacks                       | 1025                | 288        | 553       | 140       | 44        |           |
| Whites                       | 851                 | 262        | 427       | 128       | 34        |           |
| No events                    | 1709                | 538        | 908       | 217       | 46        |           |
| Incident diabetes            | 167                 | 12         | 72        | 51        | 32        |           |

Weighted %: sample weights were used to calculate weighted percent.

NHW: Non-Hispanic White; NHB: Non-Hispanic Black; MEX: Mexican American; S0: stage 0, metabolically healthy; CVD: cardiovascular disease.

## Supplemental Figure legends

Supplemental Figure 1. Cumulative diabetes incidence according to risk classification system by sex and race.

Supplemental Figure 2. Cumulative diabetes incidence according to risk classification system by sex and race in overweight or obese participants.

Supplemental Figure 3. Adjusted hazard ratios for incident diabetes in overweight or obese participants. B, C. Adjusted hazard ratios for incident diabetes. Model 1 adjusted for age, sex, race, income, education, current smoker, current alcohol drinker and parent diabetes history. Model 2 additionally adjusted for BMI.

Supplemental Figure 4. Kaplan-Meier plots for all-cause mortality according to risk classification system by sex and race.

Supplemental Figure 5. Kaplan-Meier plots for all-cause mortality according to risk classification system by sex and race among participants with BMI  $\geq 25\text{kg/m}^2$ .

Supplemental Figure 6. Adjusted hazard ratios for all-cause mortality for risk classification system in overweight or obese subjects. B, C. Adjusted hazard ratios for all-cause mortality for risk staging system. Model 1 adjusted for age, sex, race, income, education, current smoker, and current alcohol drinker. Model 2 additionally adjusted for BMI.

Supplemental Figure 7. Kaplan-Meier plots for CVD mortality according to risk classification system by sex and race.

Supplemental Figure 8. Kaplan-Meier plots for CVD mortality according to risk classification system by sex and race among participants with BMI  $\geq 25\text{kg/m}^2$ .

Supplemental Figure 9. Adjusted hazard ratios for cardiovascular mortality for risk classification system in overweight or obese subjects. B, C. Adjusted hazard ratios for all-cause mortality for risk staging system. Model 1 adjusted for age, sex, race, income, education, current smoker, and current alcohol drinker. Model 2 additionally adjusted for BMI.

Supplemental Figure 1.

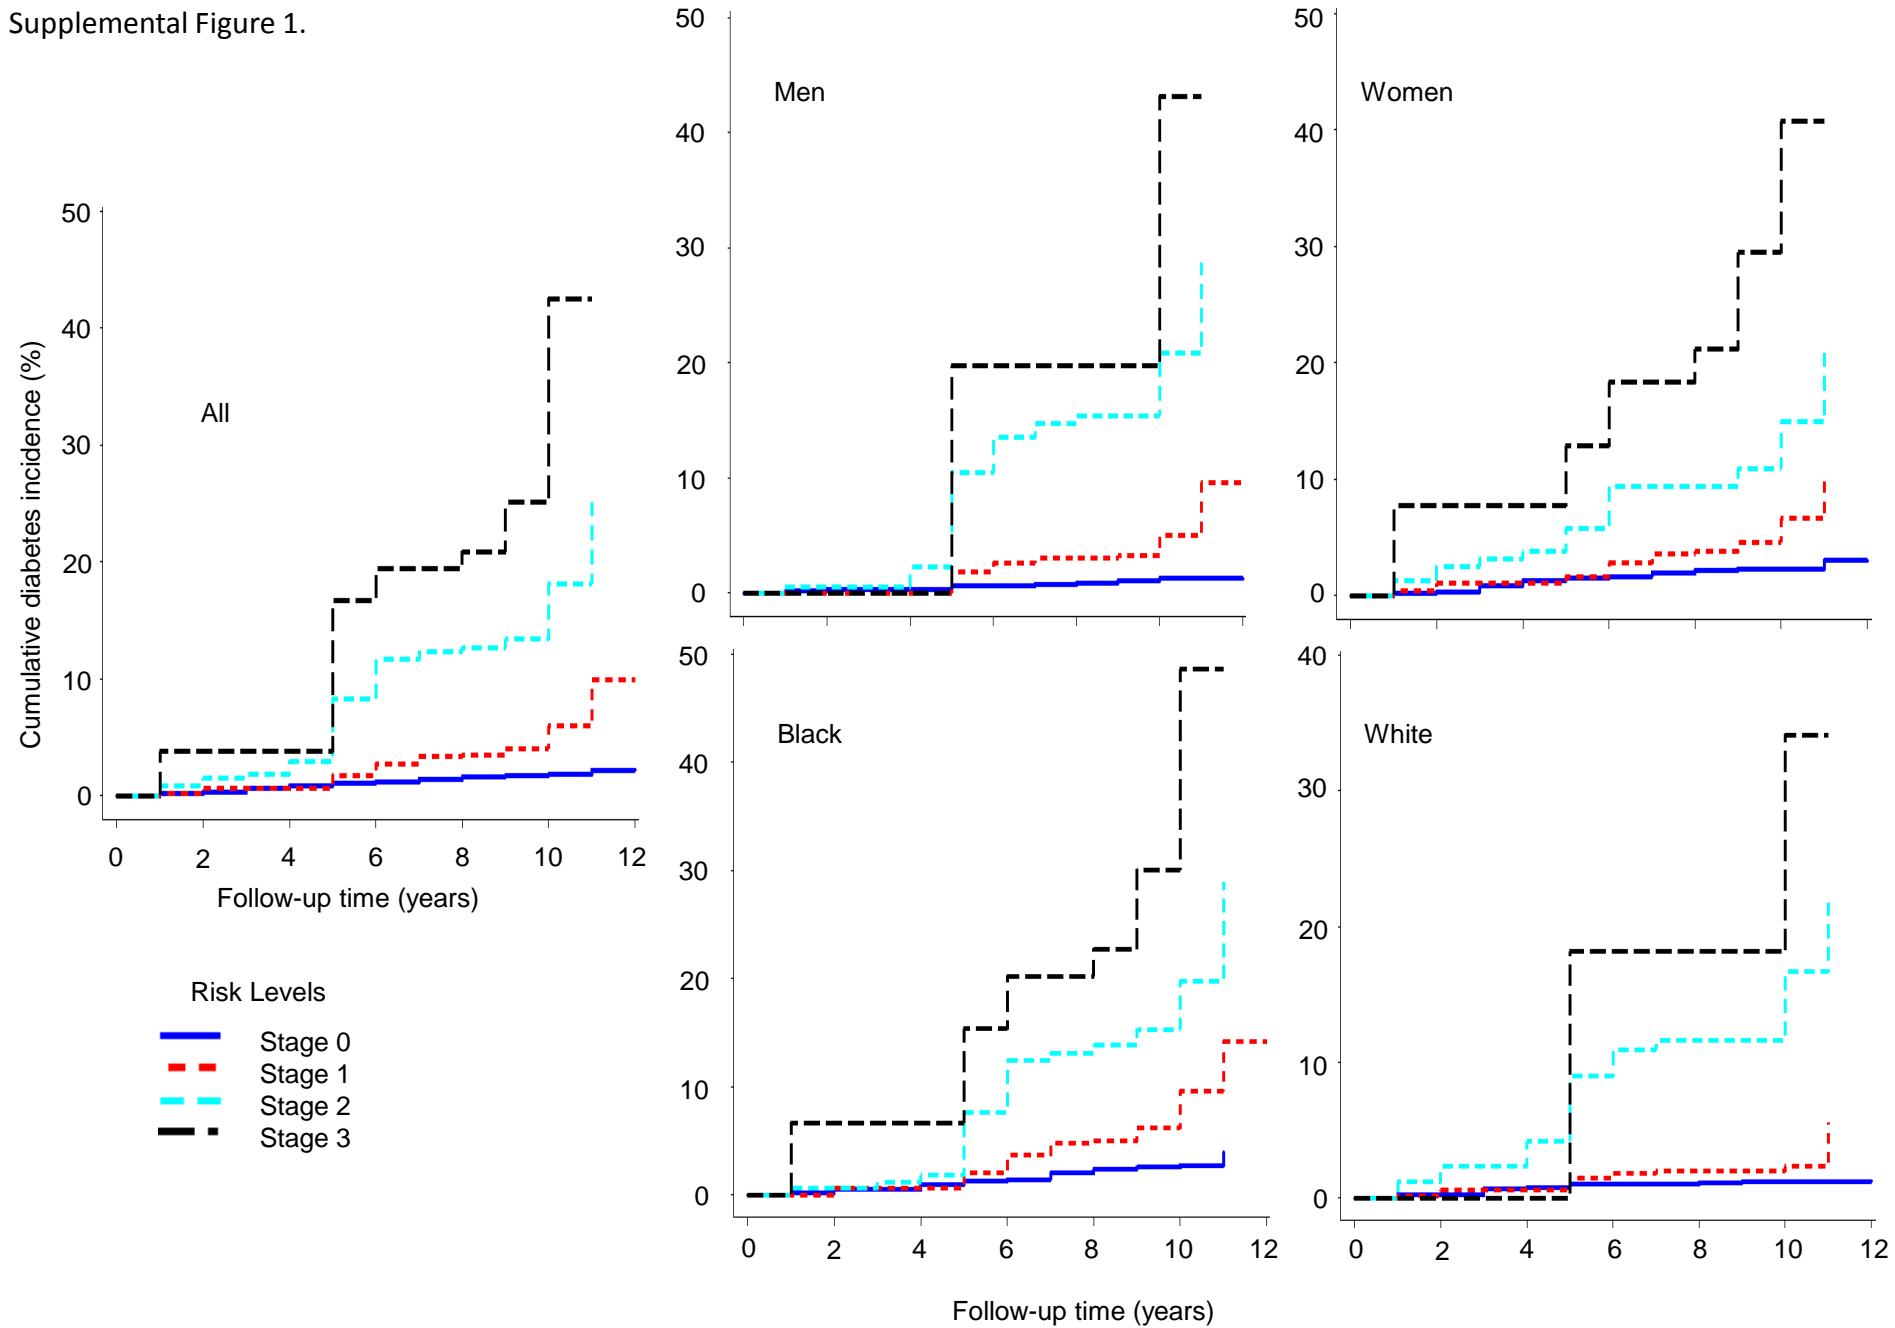

Supplemental Figure 2.

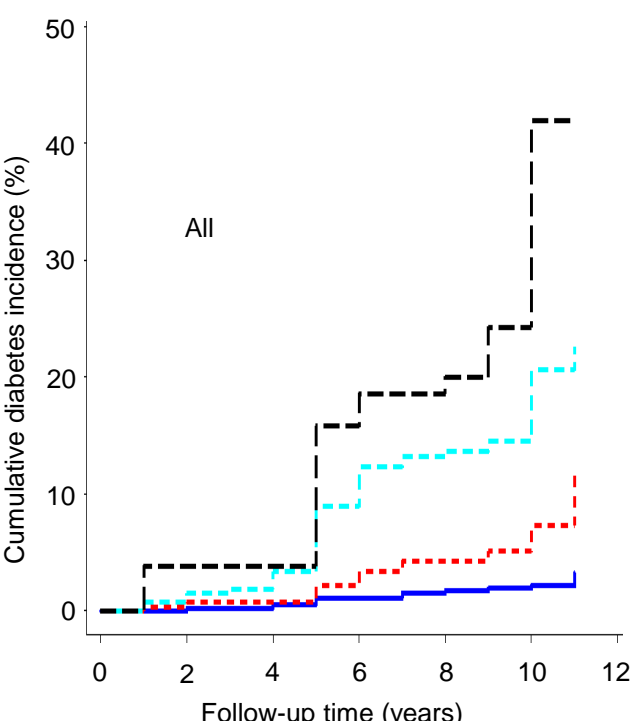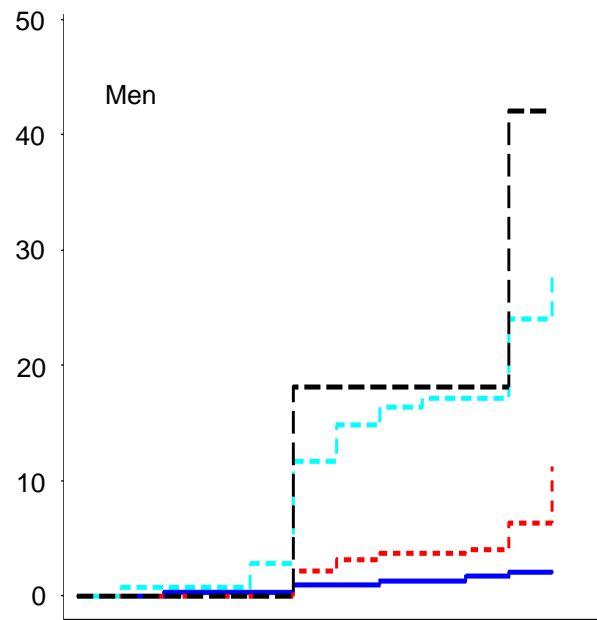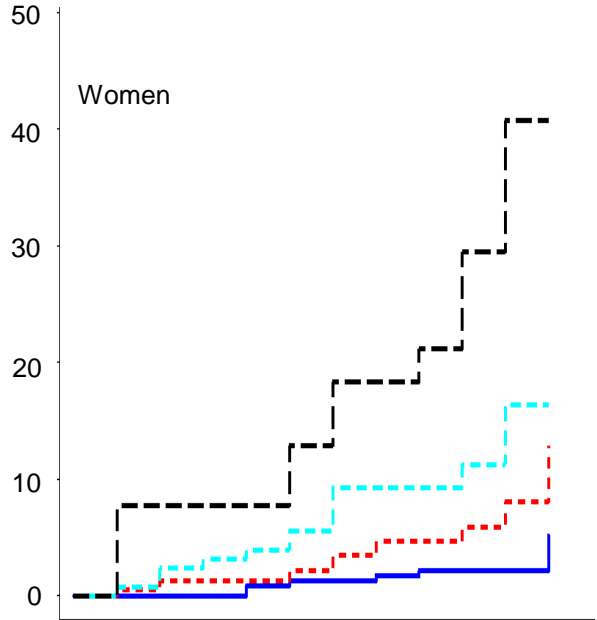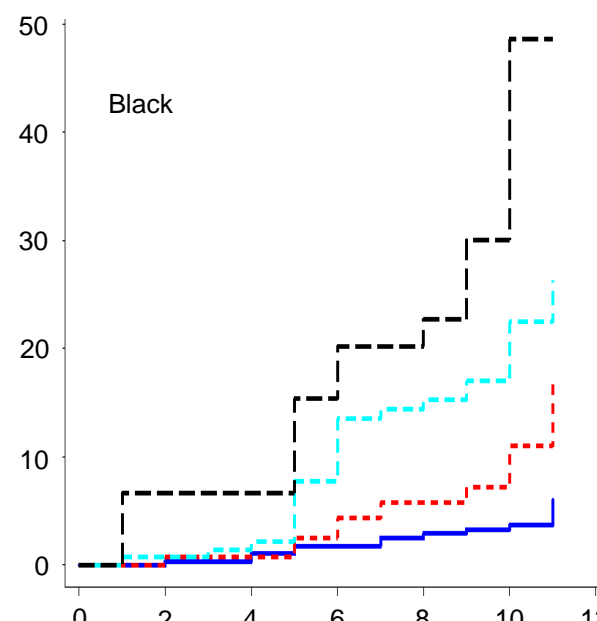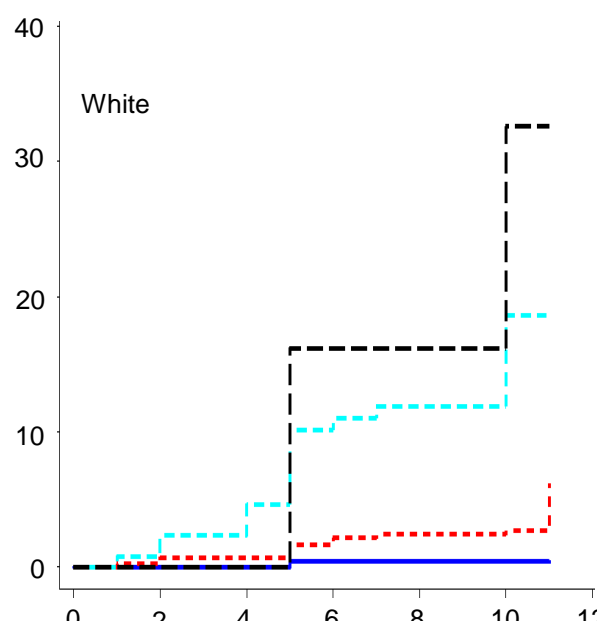

**Risk Levels**

- Stage 0 (solid blue line)
- Stage 1 (dashed red line)
- Stage 2 (dashed cyan line)
- Stage 3 (dashed black line)

Follow-up time (years)

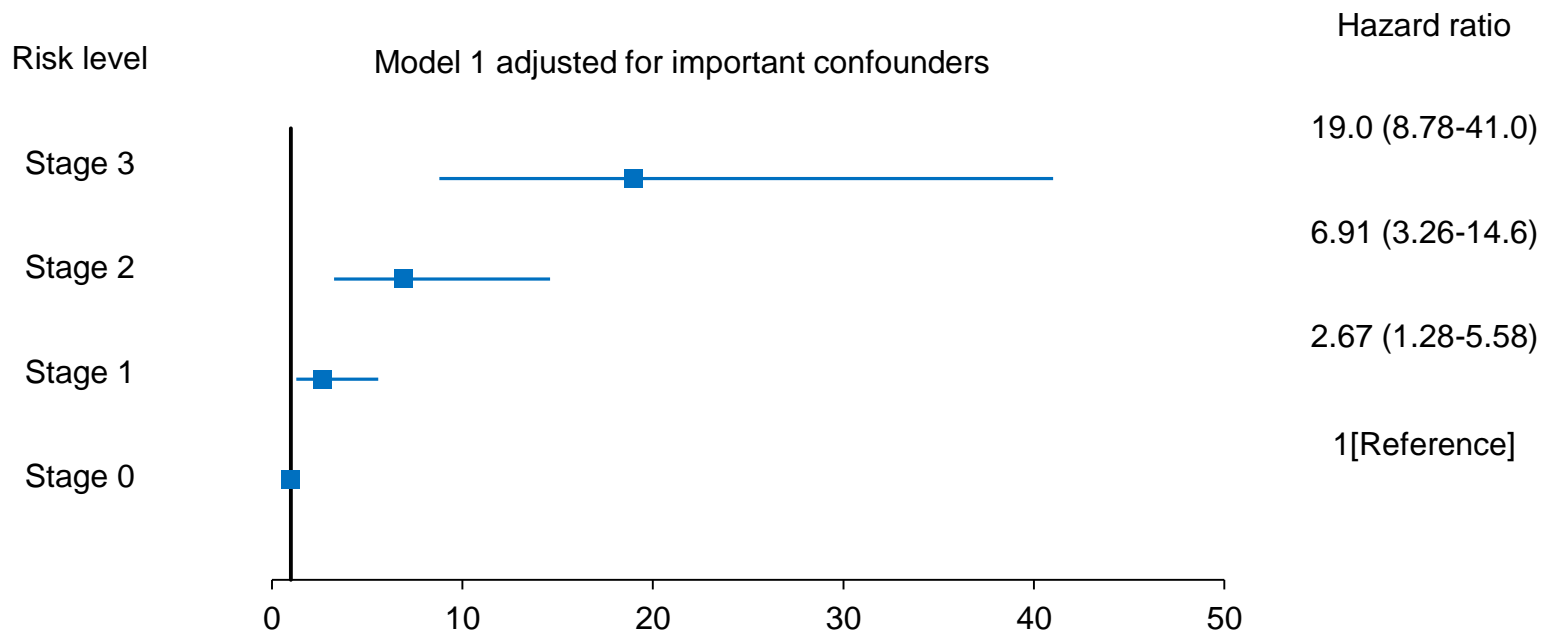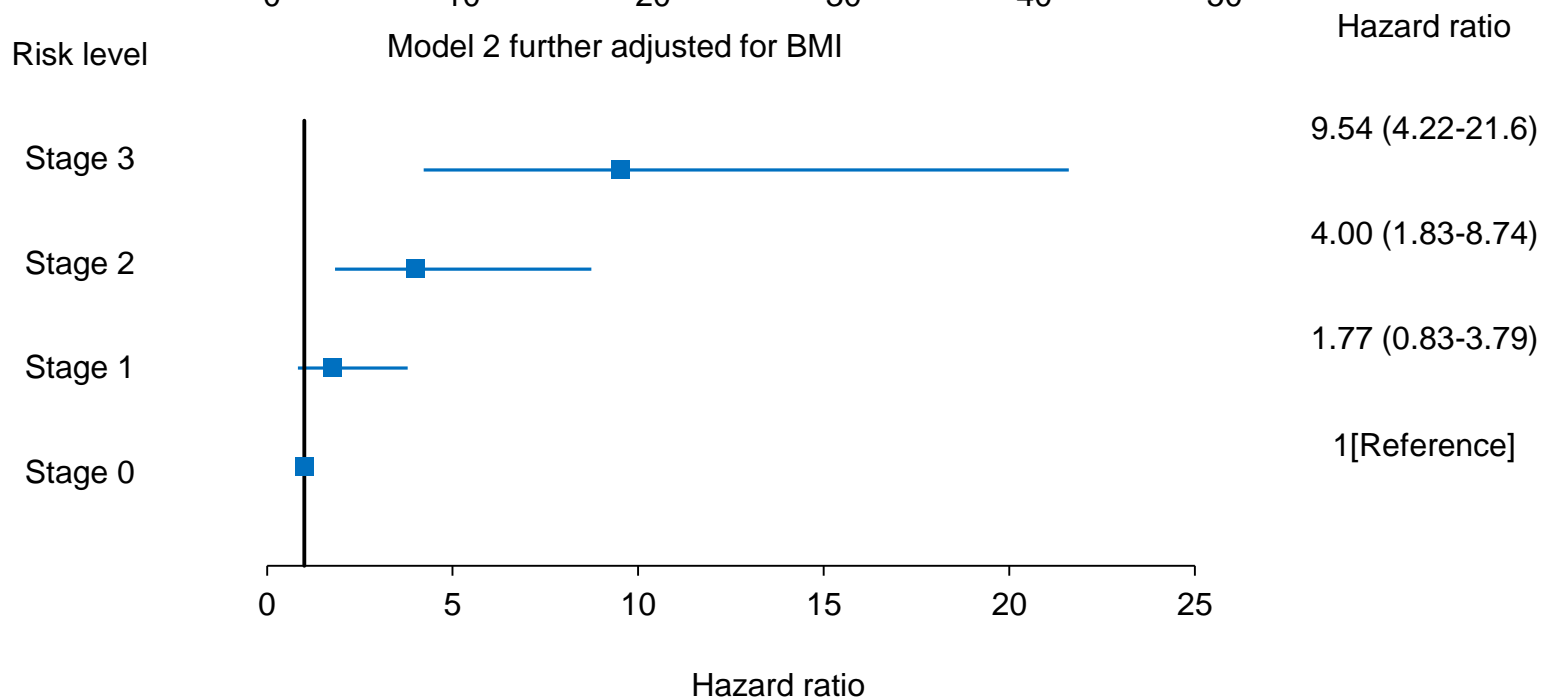

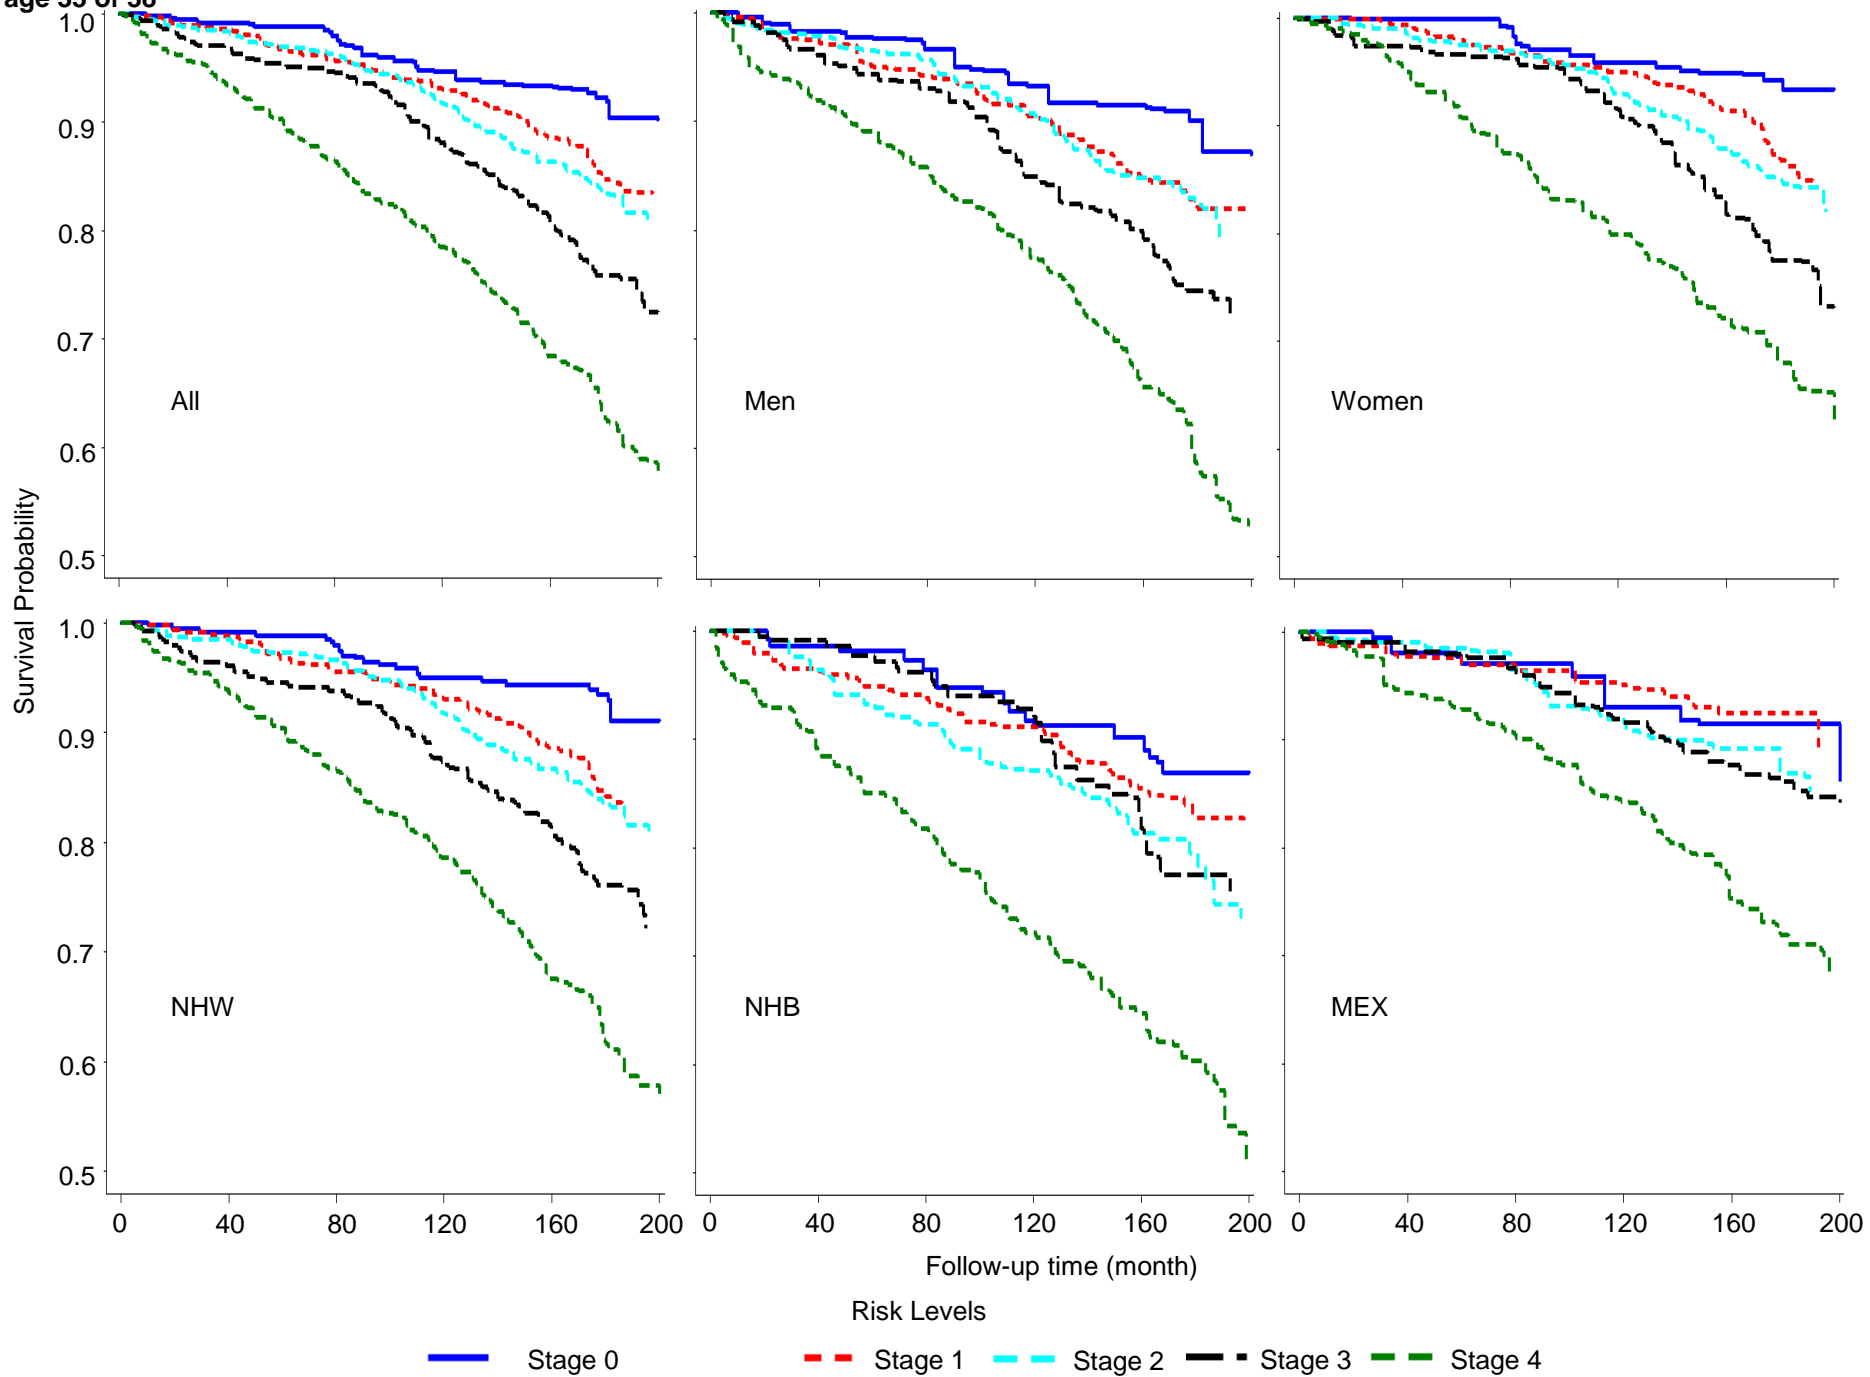

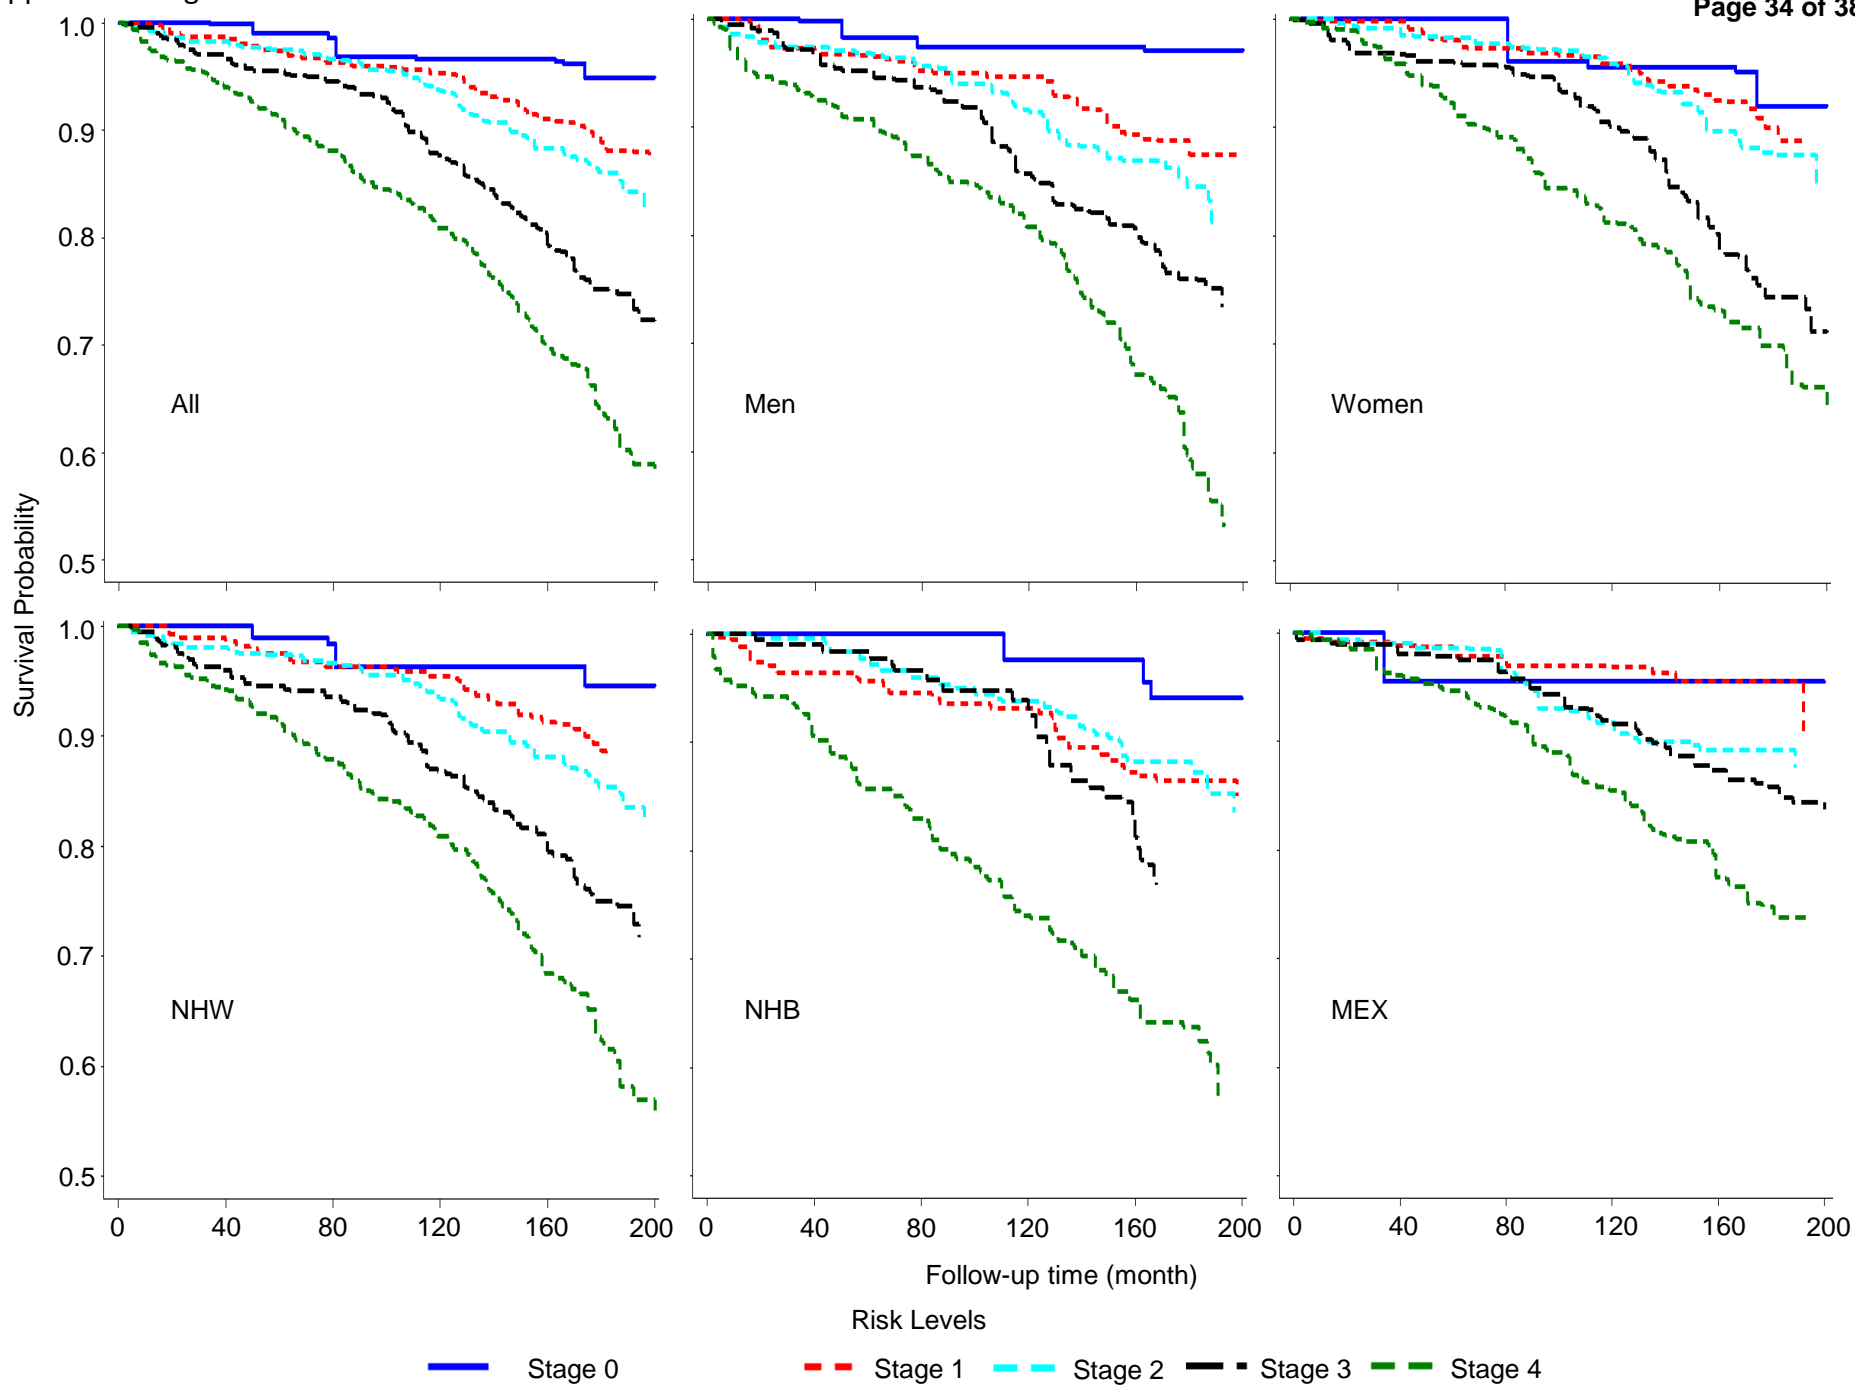

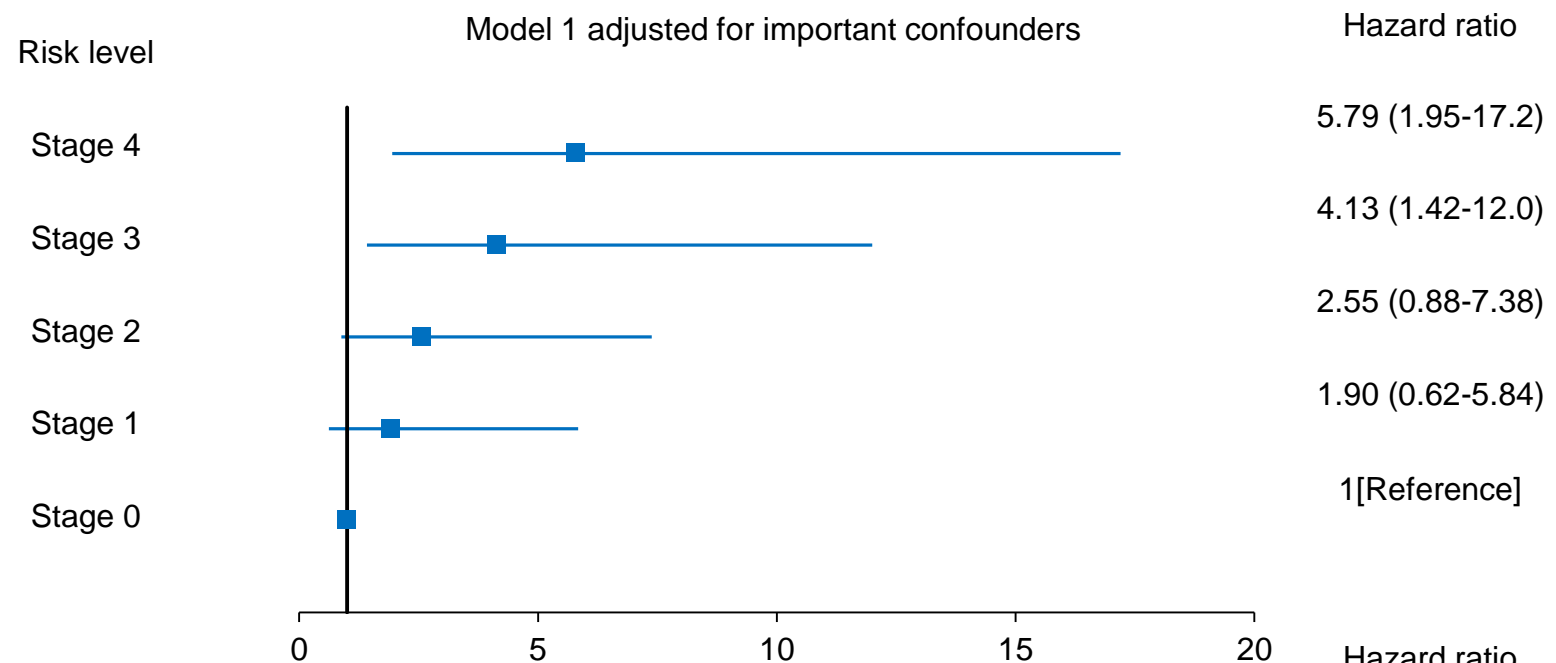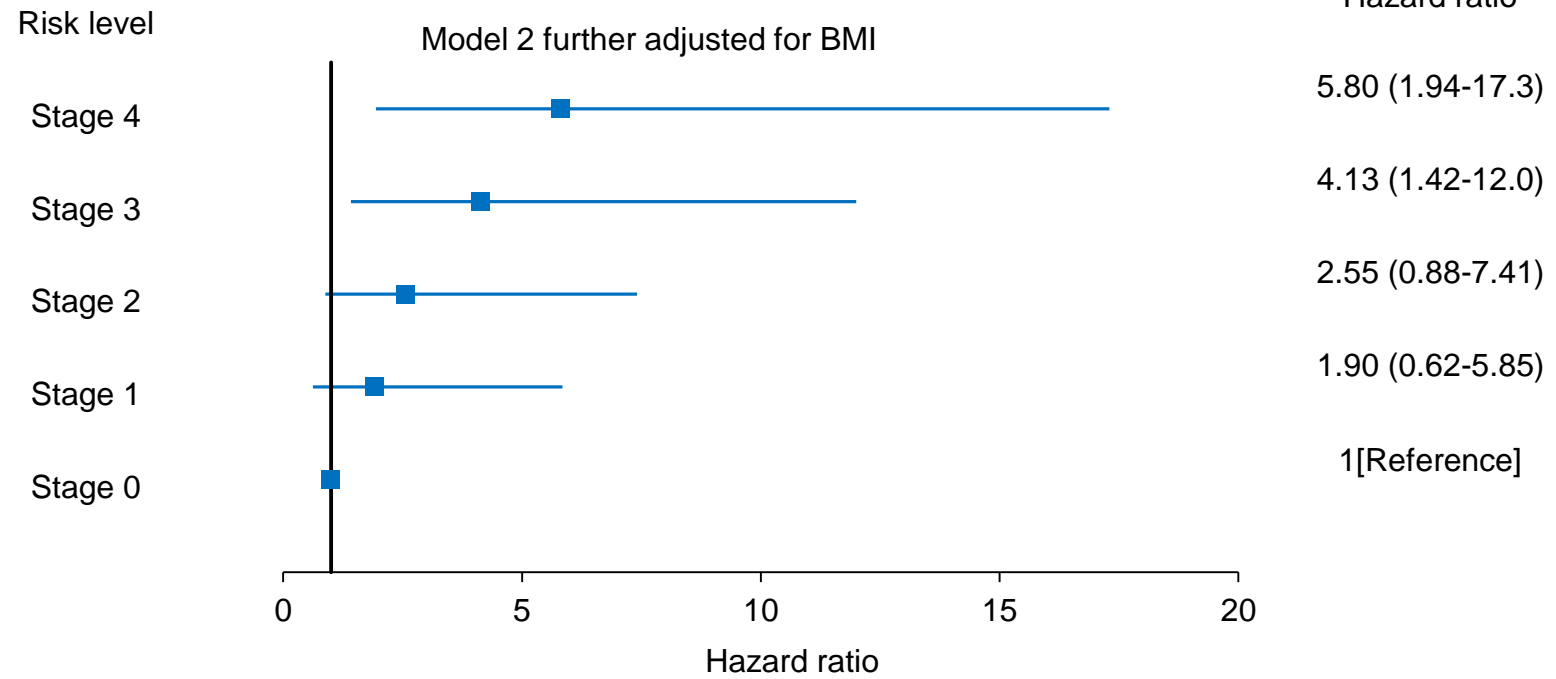



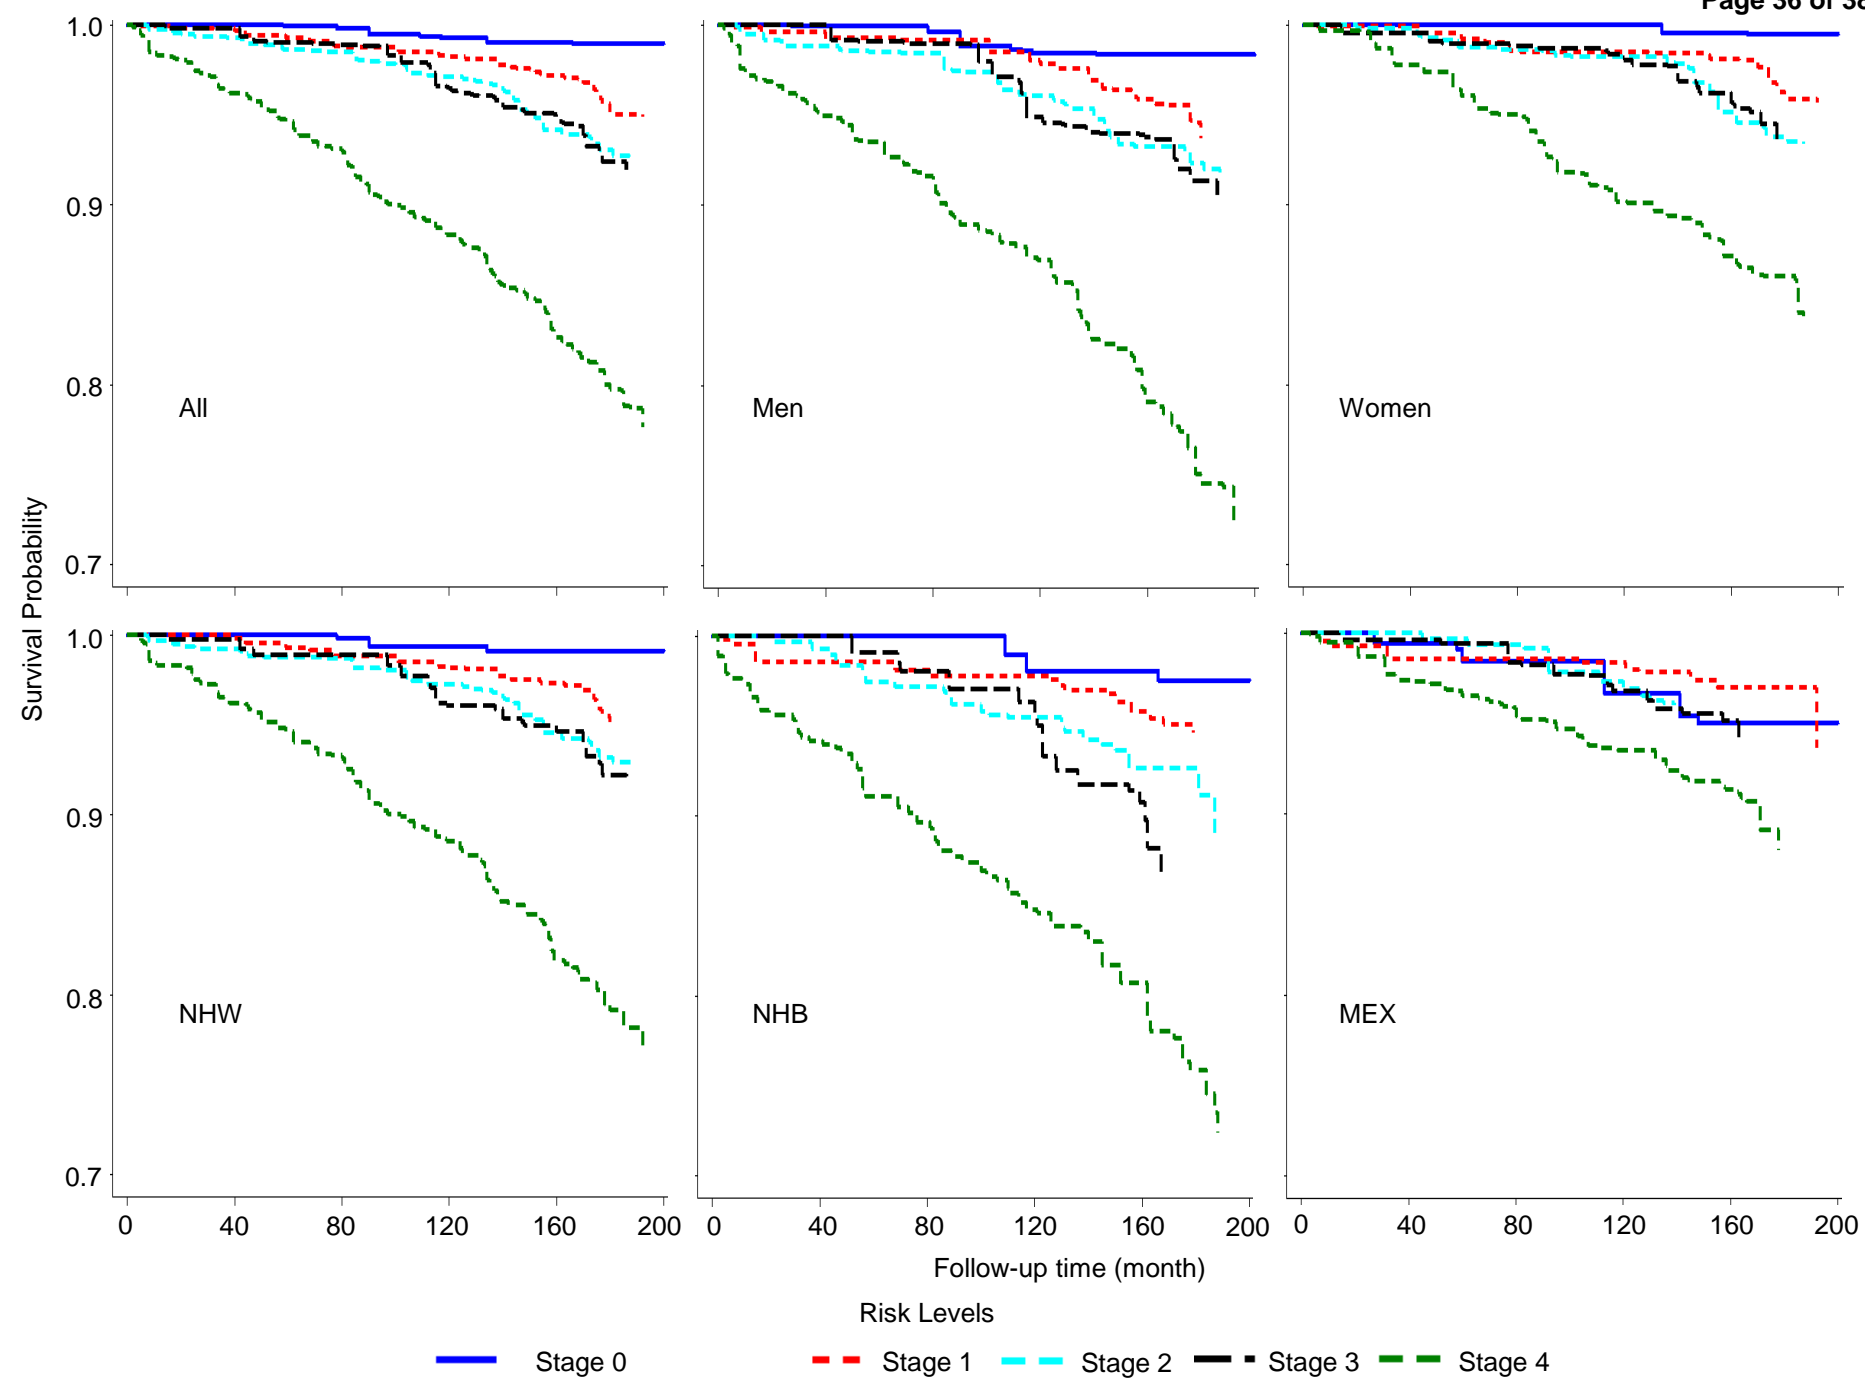

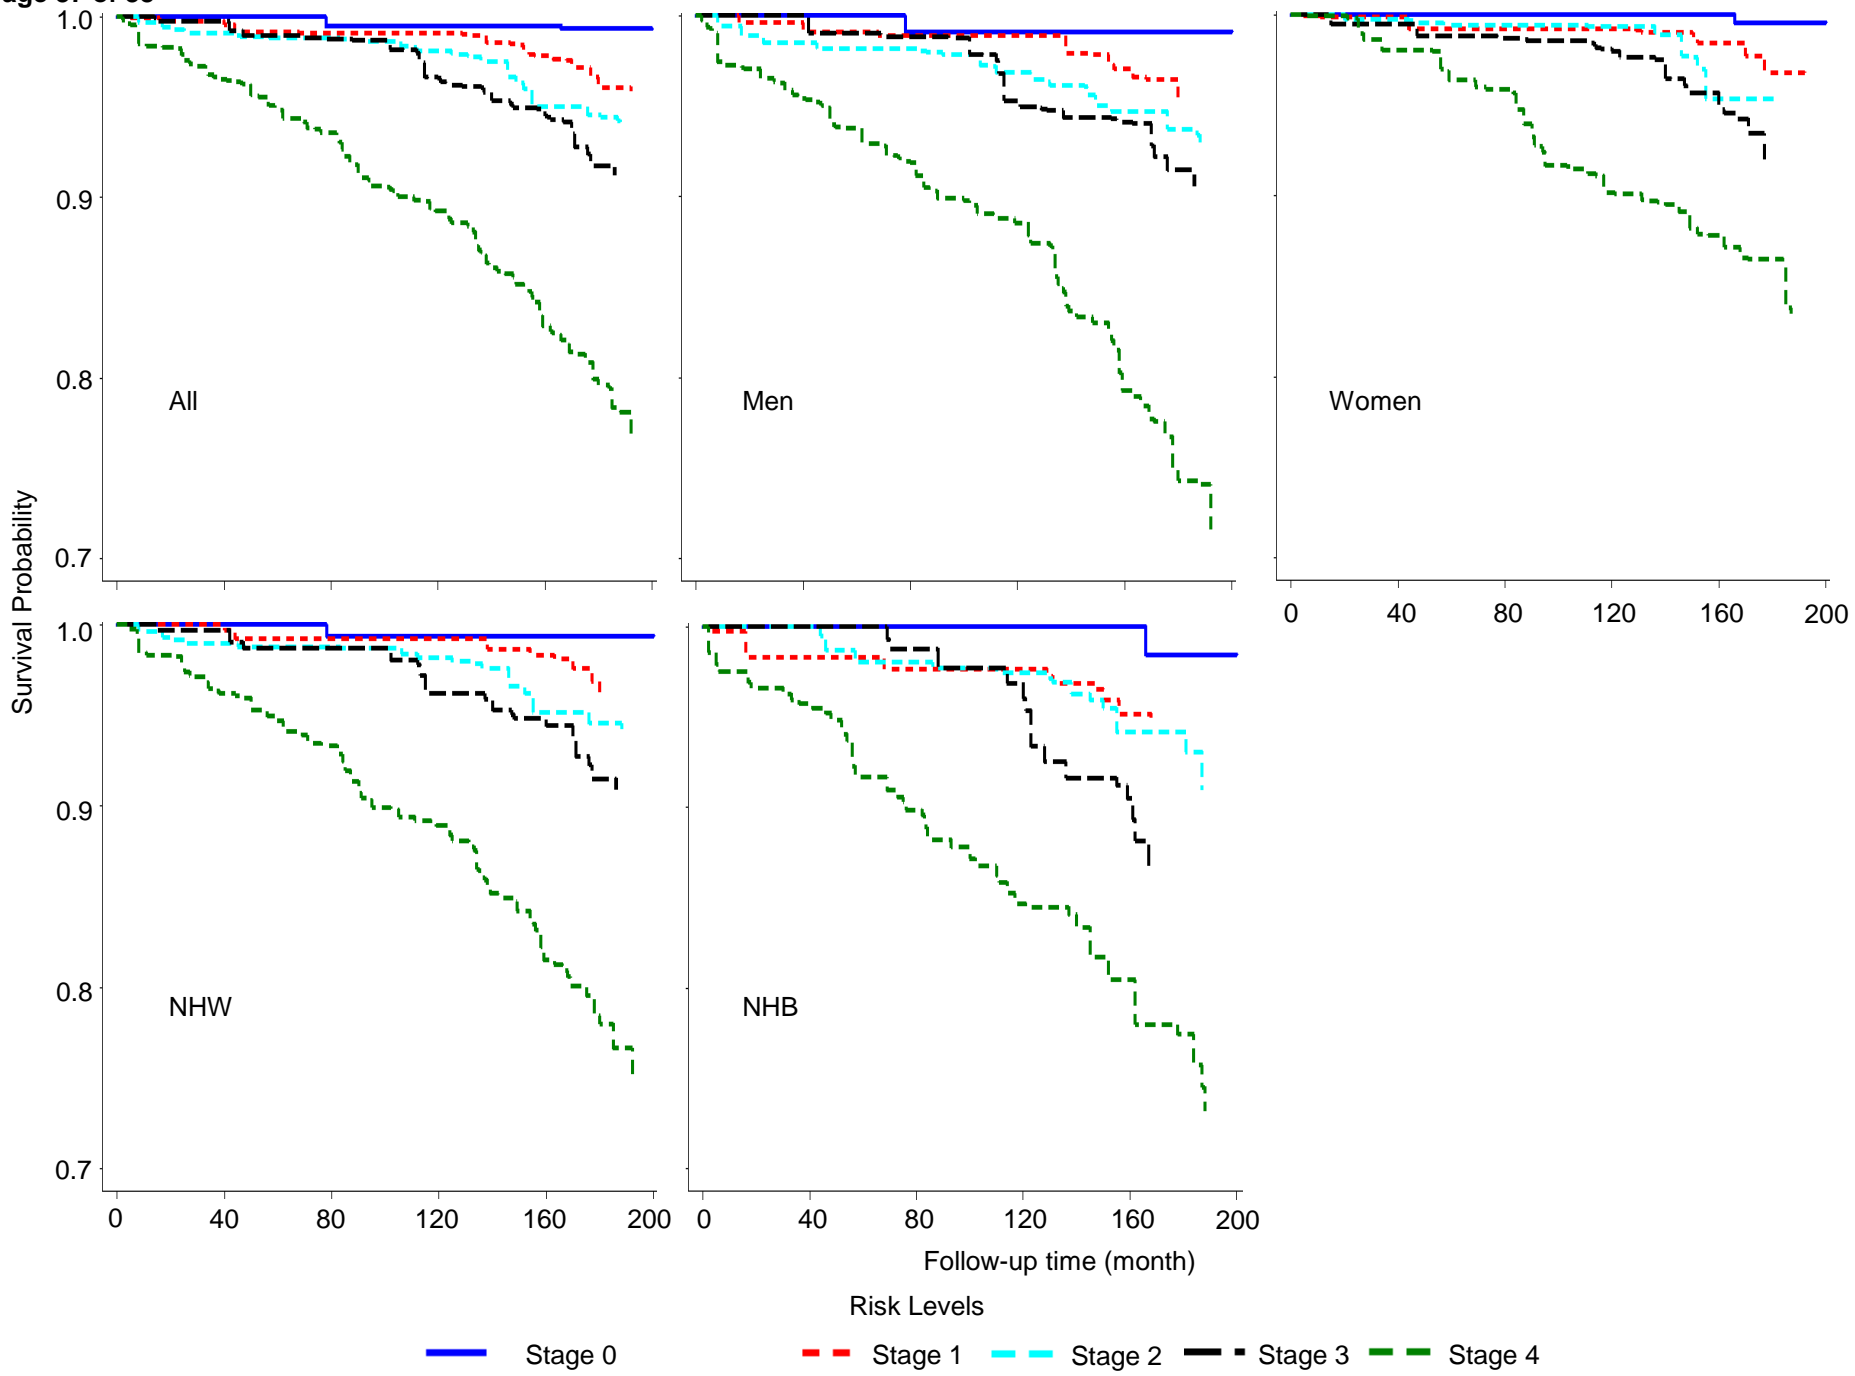

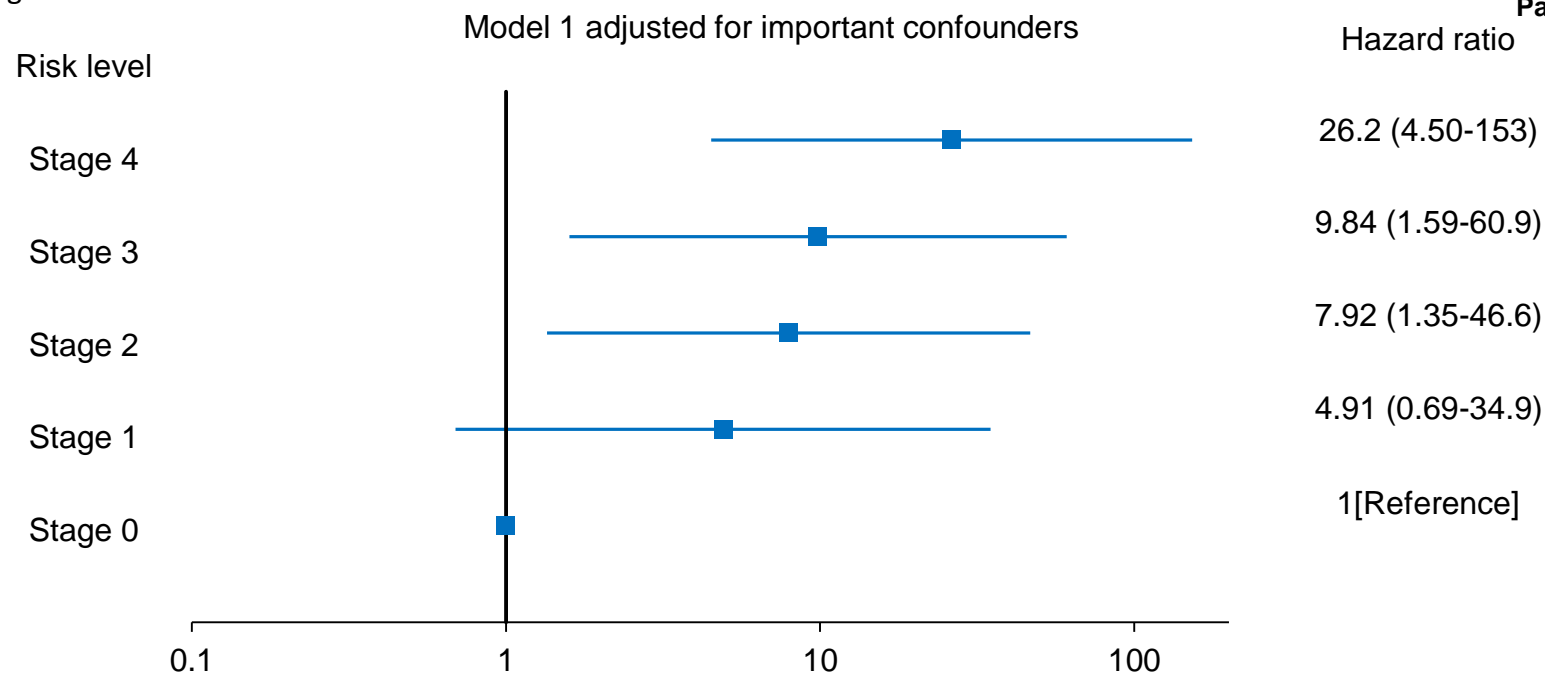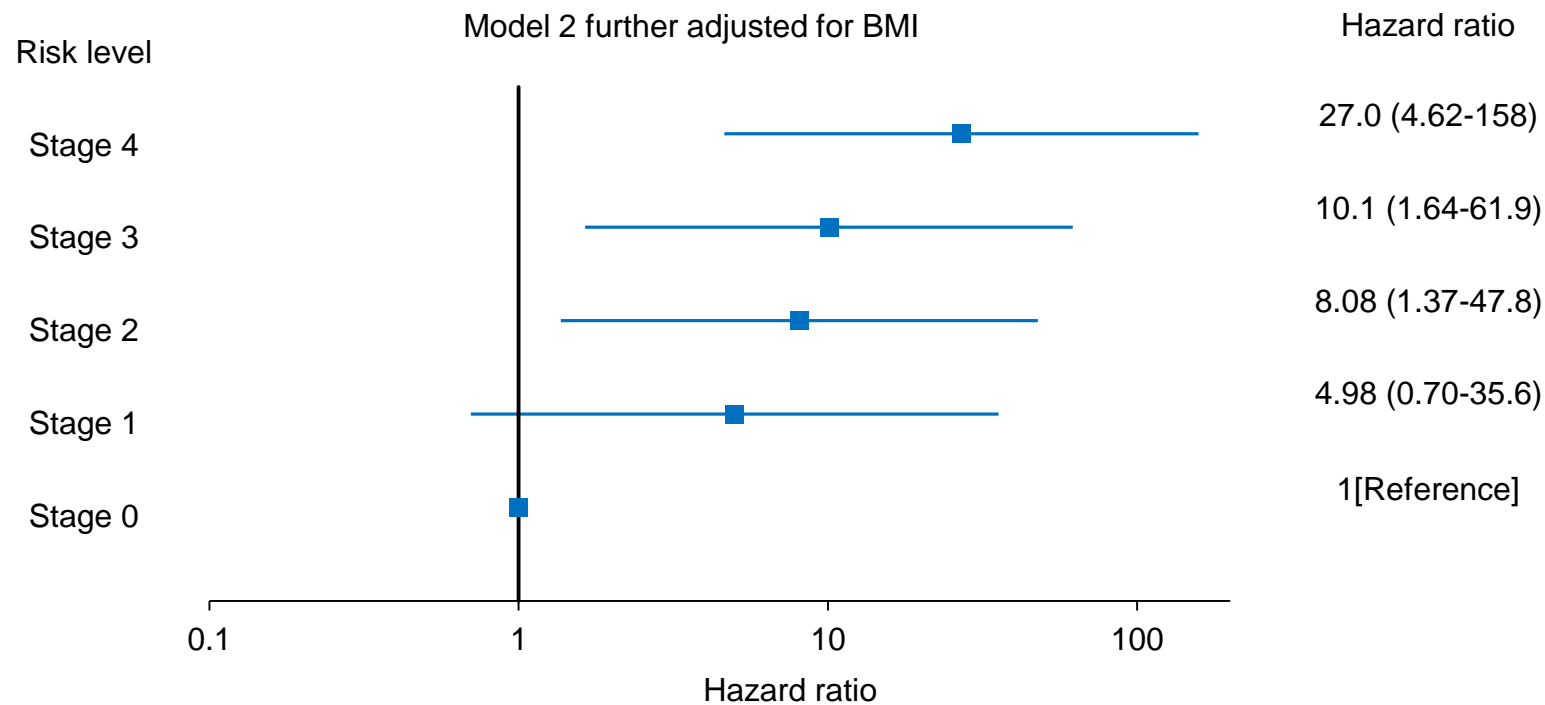

Supplement: NIHMS508674-supplement-supplement_1.pdf [file NIHMS508674-supplement-supplement_1.pdf]
